# Supplementary material for: Synergistic catalysis of Au–Cu/TiO2-NB nanopaper in aerobic oxidation of benzyl alcohol
Source: Royal Society of Chemistry journal article supplement (doi:10.1039/c4ta01503g), 2014-01-01
Supplement: c4ta01503g1.pdf [file c4ta01503g1.pdf]

## Synergistic Catalysis of Au–Cu/TiO<sub>2</sub>-NB Nanopaper in Aerobic Oxidation of Benzyl Alcohol

Qinqin Jia<sup>a</sup>, Dongfang Zhao<sup>b</sup>, Bin Tang<sup>a</sup>, Na Zhao<sup>a</sup>, Haidong Li<sup>b</sup>, Yuanhua Sang<sup>b</sup>, Nan  
Bao<sup>c</sup>, Xiaomei Zhang<sup>a</sup>, Xiaohong Xu<sup>\*a</sup> and Hong Liu<sup>\*b</sup>

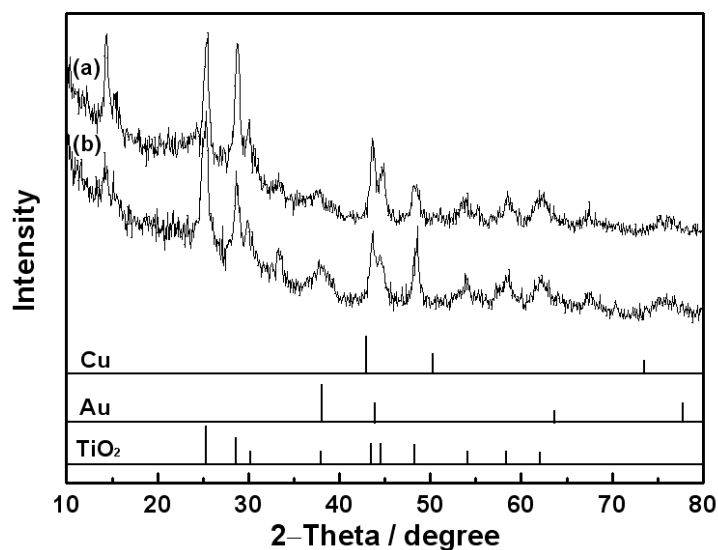

Fig. S1 The XRD patterns of (a) as-synthesized Au-Cu/TiO<sub>2</sub>-NB and (b) TiO<sub>2</sub> nanobelts samples

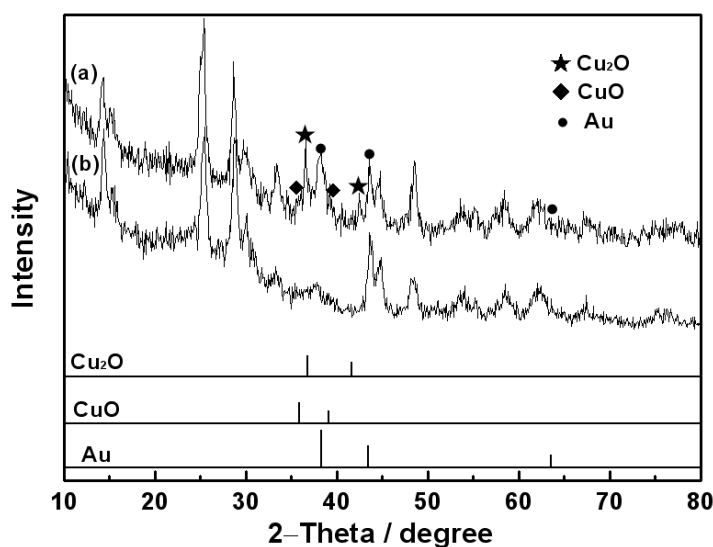

Fig. S2 The XRD patterns of (a) Au-Cu/TiO<sub>2</sub>-NB sample with several times of metal loading and (b) TiO<sub>2</sub> nanobelts samples

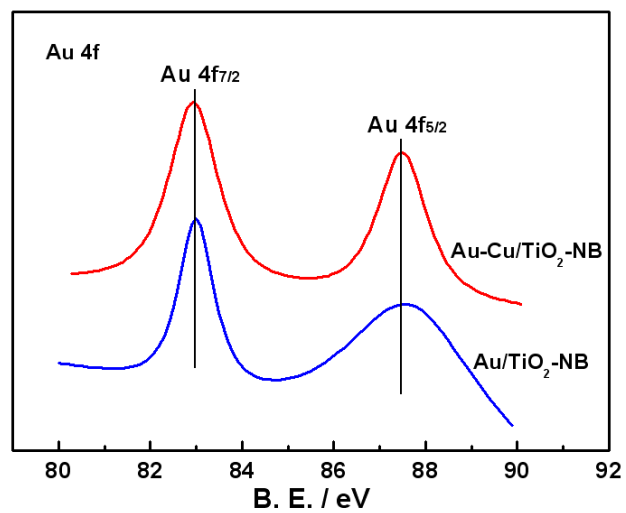

Fig. S3 Au 4f XPS spectra in Au/TiO<sub>2</sub>-NB and Au-Cu/TiO<sub>2</sub>-NB nanostructures

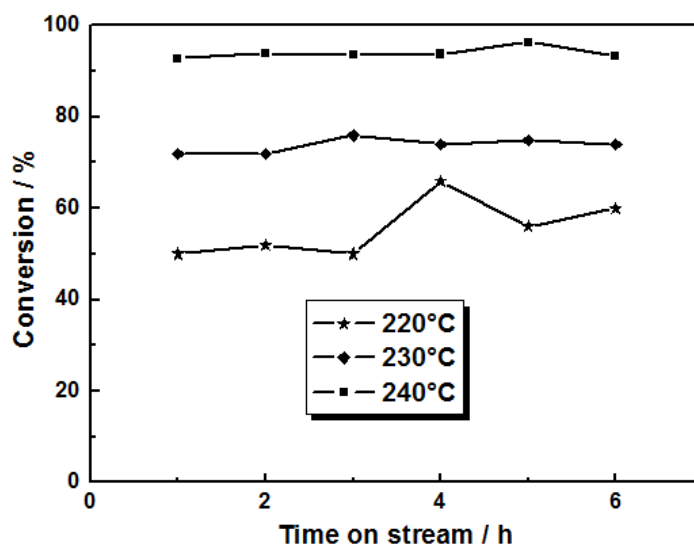

Fig. S4 The catalytic performances of Au-Cu/TiO<sub>2</sub>-NB nanopaper for benzyl alcohol oxidation at different reaction temperatures

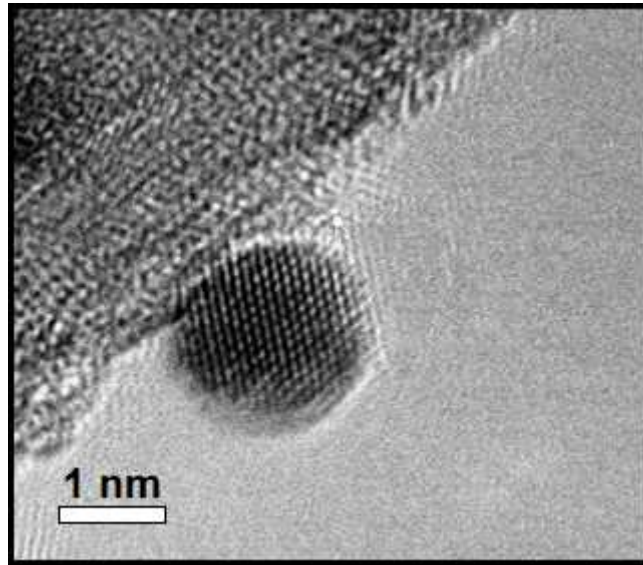

**Fig. S5** The HRTEM image of Au-Cu/TiO<sub>2</sub>-NB nanostructure after reaction
